# Supplementary material for: Diagnostic validity and solute-corrected prevalence for hyponatremia and hypernatremia among 1 813 356 admissions
Source: PubMed Central journal article supplement (PMC11630772; doi:10.1093/ckj/sfae319), 2024-10-24
Supplement: sfae319_supplemental_file.pdf [file sfae319_supplemental_file.pdf]

## 1 Supplemental Methods

2 The equations for corrected sodium concentrations using mmol/L of glucose and  
3 triglycerides.

4       Glucose – corrected sodium concentration =  $[Na^+] + 2.4 \times \frac{glucose \times 18 - 100}{100}$

5       TG – corrected sodium concentration =  $[Na^+] + [Na^+] \times \frac{186 \times TG - 60}{10000}$

6

7 *where  $[Na^+]$  indicates measured sodium concentration, glucose refers to blood glucose*

8 *concentration (mmol/L) and TG refers to triglyceride concentration (mmol/L)*

9
